# Supplementary material for: Mesoporous TiO2 coated ZnFe2O4 nanocomposite loading on activated fly ash cenosphere for visible light photocatalysis
Source: Royal Society of Chemistry journal article supplement (doi:10.1039/c7ra11055c), 2018-01-01
Supplement: c7ra11055c1.pdf [file c7ra11055c1.pdf]

## Mesoporous TiO<sub>2</sub> coating ZnFe<sub>2</sub>O<sub>4</sub> nanocomposite loading on activated fly ash cenosphere for visible light photocatalysis

Hougang Fan, Dandan Chen, Xuefeng Ai, Shuo Han, Maobin Wei, Lili Yang, Huilian

Liu, Jinghai Yang\*

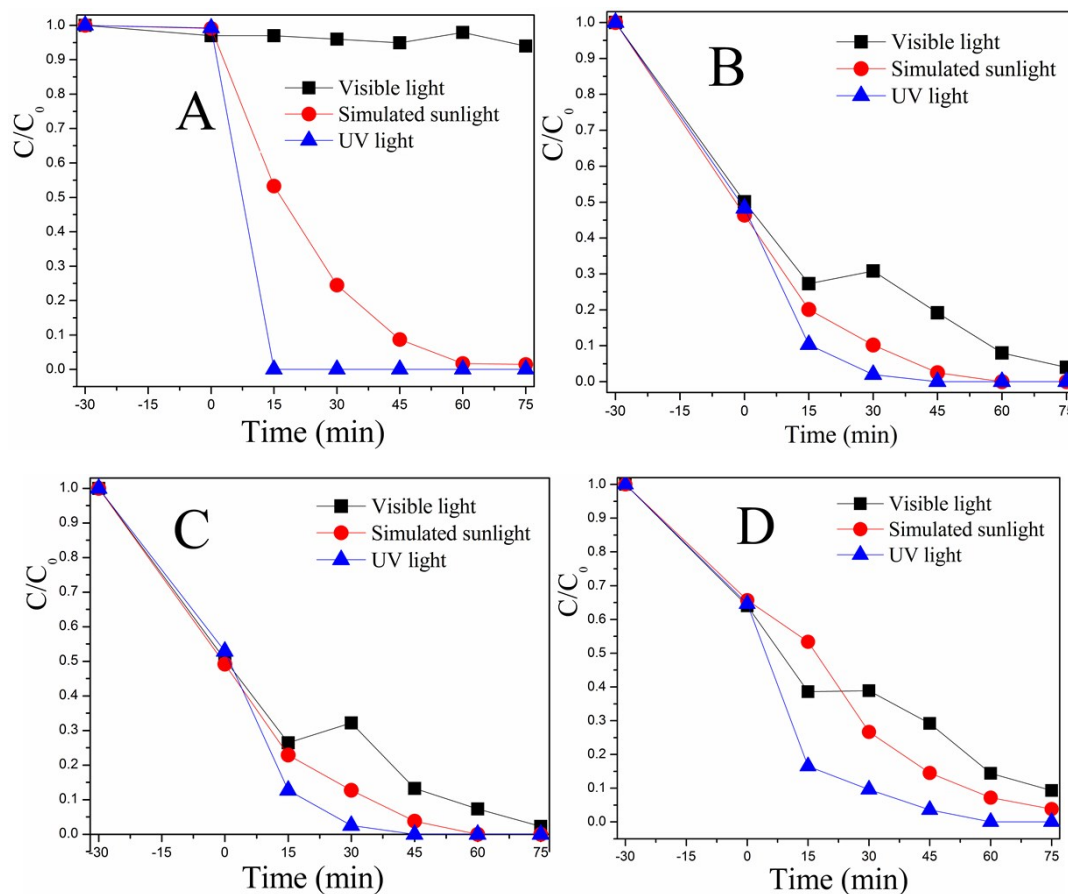

**Fig. S1.** Photocatalytic degradation of RhB under illumination of: the visible light, simulated sunlight and UV light using (A) pristine TiO<sub>2</sub> (B) TiO<sub>2</sub>/ZnFe<sub>2</sub>O<sub>4</sub> (C) TiO<sub>2</sub>/ZnFe<sub>2</sub>O<sub>4</sub>/0.02g AFAC (D) TiO<sub>2</sub>/ZnFe<sub>2</sub>O<sub>4</sub>/0.30g AFAC

\* Corresponding author: E-mail address: jhyang1@jlnu.edu.cn
